# Supplementary material for: Molecular Evolution and Functional Analysis of Rubredoxin-Like Proteins in Plants
Source: Biomed Res Int. 2019 Jul 2;2019:2932585. doi: 10.1155/2019/2932585 (PMC6634066; doi:10.1155/2019/2932585)
Supplement: Supplementary 1 — S1 File. Relevant GEO datasets used in the study. [file 2932585.f1.xlsx]

## Sheet: Sheet1
Expression Analysis of Rubredoxins in Plants
Expression Analysis of Rubredoxins in different tissues and devolopment stages at Arabidopsis thaliana
GEO accession	Experiment type	GSM accession	Tittle	Source name	Treatment group
GSE34188	Expression profiling by array	GSM843609	Silique_rep1	Silique	tissue
GSE34188	Expression profiling by array	GSM843610	Silique_rep2	Silique	tissue
GSE34188	Expression profiling by array	GSM843611	Silique_rep3	Silique	tissue
GSE34188	Expression profiling by array	GSM843612	Old_Silique_rep1	Old_Silique	tissue
GSE34188	Expression profiling by array	GSM843613	Old_Silique_rep2	Old_Silique	tissue
GSE34188	Expression profiling by array	GSM843614	Old_Silique_rep3	Old_Silique	tissue
GSE34188	Expression profiling by array	GSM843615	Flower_rep1	Flower	tissue
GSE34188	Expression profiling by array	GSM843616	Flower_rep2	Flower	tissue
GSE34188	Expression profiling by array	GSM843617	Flower_rep3	Flower	tissue
GSE34188	Expression profiling by array	GSM843618	Stem_rep1	Stem	tissue
GSE34188	Expression profiling by array	GSM843619	Stem_rep2	Stem	tissue
GSE34188	Expression profiling by array	GSM843620	Stem_rep3	Stem	tissue
GSE34188	Expression profiling by array	GSM843621	Rosette_rep1	Rosette	tissue
GSE34188	Expression profiling by array	GSM843622	Rosette_rep2	Rosette	tissue
GSE34188	Expression profiling by array	GSM843623	Rosette_rep3	Rosette	tissue
GSE34188	Expression profiling by array	GSM843624	Cauline_leaves_rep1	Cauline_leaves	tissue
GSE34188	Expression profiling by array	GSM843625	Cauline_leaves_rep2	Cauline_leaves	tissue
GSE34188	Expression profiling by array	GSM843626	Cauline_leaves_rep3	Cauline_leaves	tissue
GSE34188	Expression profiling by array	GSM843627	Young_Rosette_rep1	Young_Rosette	tissue
GSE34188	Expression profiling by array	GSM843628	Young_Rosette_rep2	Young_Rosette	tissue
GSE34188	Expression profiling by array	GSM843629	Young_Rosette_rep3	Young_Rosette	tissue
GSE34188	Expression profiling by array	GSM843630	Young_Bud_rep1	Young_Bud	tissue
GSE34188	Expression profiling by array	GSM843631	Young_Bud_rep2	Young_Bud	tissue
GSE34188	Expression profiling by array	GSM843632	Young_Bud_rep3	Young_Bud	tissue
GSE34188	Expression profiling by array	GSM843633	Bud_rep1	Bud	tissue
GSE34188	Expression profiling by array	GSM843634	Bud_rep2	Bud	tissue
GSE34188	Expression profiling by array	GSM843635	Bud_rep3	Bud	tissue
GSE34188	Expression profiling by array	GSM843636	Root_rep1	Root	tissue
GSE34188	Expression profiling by array	GSM843637	Root_rep2	Root	tissue
GSE34188	Expression profiling by array	GSM843638	Root_rep3	Root	tissue
Expression Analysis of Rubredoxins in different tissues and devolopment stages at Oryza Sativa
GEO accession	Experiment type	GSM accession	Tittle	Source name	Cultivar
GSE21494	Expression profiling by array	GSM534579	LeafBlade_27DAT_12:00_rep1	Leaf blade,27 days after transplanting,12:00,replicate1	Nipponbare
GSE21494	Expression profiling by array	GSM534580	LeafBlade_27DAT_12:00_rep2	Leaf blade,27 days after transplanting,12:00,replicate2	Nipponbare
GSE21494	Expression profiling by array	GSM534581	LeafBlade_27DAT_12:00_rep3	Leaf blade,27 days after transplanting,12:00,replicate3	Nipponbare
GSE21494	Expression profiling by array	GSM534582	LeafBlade_27DAT_24:00_rep1	Leaf blade,27 days after transplanting,24:00,replicate1	Nipponbare
GSE21494	Expression profiling by array	GSM534583	LeafBlade_27DAT_24:00_rep2	Leaf blade,27 days after transplanting,24:00,replicate2	Nipponbare
GSE21494	Expression profiling by array	GSM534584	LeafBlade_27DAT_24:00_rep3	Leaf blade,27 days after transplanting,24:00,replicate3	Nipponbare
GSE21494	Expression profiling by array	GSM534585	LeafBlade_76DAT_12:00_rep1	Leaf blade,76 days after transplanting,12:00,replicate1	Nipponbare
GSE21494	Expression profiling by array	GSM534586	LeafBlade_76DAT_12:00_rep2	Leaf blade,76 days after transplanting,12:00,replicate2	Nipponbare
GSE21494	Expression profiling by array	GSM534587	LeafBlade_76DAT_12:00_rep3	Leaf blade,76 days after transplanting,12:00,replicate3	Nipponbare
GSE21494	Expression profiling by array	GSM534588	LeafBlade_76DAT_24:00_rep1	Leaf blade,76 days after transplanting,24:00,replicate1	Nipponbare
GSE21494	Expression profiling by array	GSM534589	LeafBlade_76DAT_24:00_rep2	Leaf blade,76 days after transplanting,24:00,replicate2	Nipponbare
GSE21494	Expression profiling by array	GSM534590	LeafBlade_76DAT_24:00_rep3	Leaf blade,76 days after transplanting,24:00,replicate3	Nipponbare
GSE21494	Expression profiling by array	GSM534591	LeafBlade_125DAT_12:00_rep1	Leaf blade,125 days after transplanting,12:00,replicate1	Nipponbare
GSE21494	Expression profiling by array	GSM534592	LeafBlade_125DAT_12:00_rep2	Leaf blade,125 days after transplanting,12:00,replicate2	Nipponbare
GSE21494	Expression profiling by array	GSM534593	LeafBlade_125DAT_12:00_rep3	Leaf blade,125 days after transplanting,12:00,replicate3	Nipponbare
GSE21494	Expression profiling by array	GSM534594	LeafBlade_125DAT_24:00_rep1	Leaf blade,125 days after transplanting,24:00,replicate1	Nipponbare
GSE21494	Expression profiling by array	GSM534595	LeafBlade_125DAT_24:00_rep2	Leaf blade,125 days after transplanting,24:00,replicate2	Nipponbare
GSE21494	Expression profiling by array	GSM534596	LeafBlade_125DAT_24:00_rep3	Leaf blade,125 days after transplanting,24:00,replicate3	Nipponbare
GSE21494	Expression profiling by array	GSM534597	LeafSheath_27DAT_12:00_rep1	Leaf sheath,27 days after transplanting,12:00,replicate1	Nipponbare
GSE21494	Expression profiling by array	GSM534598	LeafSheath_27DAT_12:00_rep2	Leaf sheath,27 days after transplanting,12:00,replicate2	Nipponbare
GSE21494	Expression profiling by array	GSM534599	LeafSheath_27DAT_12:00_rep3	Leaf sheath,27 days after transplanting,12:00,replicate3	Nipponbare
GSE21494	Expression profiling by array	GSM534600	LeafSheath_27DAT_24:00_rep1	Leaf sheath,27 days after transplanting,24:00,replicate1	Nipponbare
GSE21494	Expression profiling by array	GSM534601	LeafSheath_27DAT_24:00_rep2	Leaf sheath,27 days after transplanting,24:00,replicate2	Nipponbare
GSE21494	Expression profiling by array	GSM534602	LeafSheath_27DAT_24:00_rep3	Leaf sheath,27 days after transplanting,24:00,replicate3	Nipponbare
GSE21494	Expression profiling by array	GSM534603	LeafSheath_76DAT_12:00_rep1	Leaf sheath,76 days after transplanting,12:00,replicate1	Nipponbare
GSE21494	Expression profiling by array	GSM534604	LeafSheath_76DAT_12:00_rep2	Leaf sheath,76 days after transplanting,12:00,replicate2	Nipponbare
GSE21494	Expression profiling by array	GSM534605	LeafSheath_76DAT_12:00_rep3	Leaf sheath,76 days after transplanting,12:00,replicate3	Nipponbare
GSE21494	Expression profiling by array	GSM534606	LeafSheath_76DAT_24:00_rep1	Leaf sheath,76 days after transplanting,24:00,replicate1	Nipponbare
GSE21494	Expression profiling by array	GSM534607	LeafSheath_76DAT_24:00_rep2	Leaf sheath,76 days after transplanting,24:00,replicate2	Nipponbare
GSE21494	Expression profiling by array	GSM534608	LeafSheath_76DAT_24:00_rep3	Leaf sheath,76 days after transplanting,24:00,replicate3	Nipponbare
GSE21494	Expression profiling by array	GSM534609	Root_27DAT_12:00_rep1	Root,27 days after transplanting,12:00,replicate1	Nipponbare
GSE21494	Expression profiling by array	GSM534610	Root_27DAT_12:00_rep2	Root,27 days after transplanting,12:00,replicate2	Nipponbare
GSE21494	Expression profiling by array	GSM534611	Root_27DAT_12:00_rep3	Root,27 days after transplanting,12:00,replicate3	Nipponbare
GSE21494	Expression profiling by array	GSM534612	Root_27DAT_24:00_rep1	Root,27 days after transplanting,24:00,replicate1	Nipponbare
GSE21494	Expression profiling by array	GSM534613	Root_27DAT_24:00_rep2	Root,27 days after transplanting,24:00,replicate2	Nipponbare
GSE21494	Expression profiling by array	GSM534614	Root_27DAT_24:00_rep3	Root,27 days after transplanting,24:00,replicate3	Nipponbare
GSE21494	Expression profiling by array	GSM534615	Root_76DAT_12:00_rep1	Root,76 days after transplanting,12:00,replicate1	Nipponbare
GSE21494	Expression profiling by array	GSM534616	Root_76DAT_12:00_rep2	Root,76 days after transplanting,12:00,replicate2	Nipponbare
GSE21494	Expression profiling by array	GSM534617	Root_76DAT_12:00_rep3	Root,76 days after transplanting,12:00,replicate3	Nipponbare
GSE21494	Expression profiling by array	GSM534618	Root_76DAT_24:00_rep1	Root,76 days after transplanting,24:00,replicate1	Nipponbare
GSE21494	Expression profiling by array	GSM534619	Root_76DAT_24:00_rep2	Root,76 days after transplanting,24:00,replicate2	Nipponbare
GSE21494	Expression profiling by array	GSM534620	Root_76DAT_24:00_rep3	Root,76 days after transplanting,24:00,replicate3	Nipponbare
GSE21494	Expression profiling by array	GSM534630	Stem_90DAT_24:00_rep1	Stem,90 days after transplanting,24:00,replicate1	Nipponbare
GSE21494	Expression profiling by array	GSM534631	Stem_90DAT_24:00_rep2	Stem,90 days after transplanting,24:00,replicate2	Nipponbare
GSE21494	Expression profiling by array	GSM534632	Stem_90DAT_24:00_rep3	Stem,90 days after transplanting,24:00,replicate3	Nipponbare
GSE21494	Expression profiling by array	GSM534639	Inflorescence_5.0-10mm_rep1	5.0-10mm inflorescence, replicate1	Nipponbare
GSE21494	Expression profiling by array	GSM534640	Inflorescence_5.0-10mm_rep2	5.0-10mm inflorescence, replicate2	Nipponbare
GSE21494	Expression profiling by array	GSM534641	Inflorescence_5.0-10mm_rep3	5.0-10mm inflorescence, replicate3	Nipponbare
GSE21494	Expression profiling by array	GSM534650	Anther_1.6-2.0mm_rep1	1.6-2.0mm Anther, replicate 1	Nipponbare
GSE21494	Expression profiling by array	GSM534651	Anther_1.6-2.0mm_rep2	1.6-2.0mm Anther, replicate 2	Nipponbare
GSE21494	Expression profiling by array	GSM534652	Anther_1.6-2.0mm_rep3	1.6-2.0mm Anther, replicate 3	Nipponbare
GSE21494	Expression profiling by array	GSM534659	Pistil_14-18cminflorescence_rep1	Pistil from 14-18cm inflorescence, replicate1	Nipponbare
GSE21494	Expression profiling by array	GSM534660	Pistil_14-18cminflorescence_rep2	Pistil from 14-18cm inflorescence, replicate2	Nipponbare
GSE21494	Expression profiling by array	GSM534661	Pistil_14-18cminflorescence_rep3	Pistil from 14-18cm inflorescence, replicate3	Nipponbare
GSE21494	Expression profiling by array	GSM534674	Lemma_7.0mm_floret_rep1	Lemma from 7.0mm floret, replicate 1	Nipponbare
GSE21494	Expression profiling by array	GSM534675	Lemma_7.0mm_floret_rep2	Lemma from 7.0mm floret, replicate 2	Nipponbare
GSE21494	Expression profiling by array	GSM534676	Lemma_7.0mm_floret_rep3	Lemma from 7.0mm floret, replicate 3	Nipponbare
GSE21494	Expression profiling by array	GSM534677	Palea_7.0mm_floret_rep1	Palea from 7.0mm floret, replicate 1	Nipponbare
GSE21494	Expression profiling by array	GSM534678	Palea_7.0mm_floret_rep2	Palea from 7.0mm floret, replicate 2	Nipponbare
GSE21494	Expression profiling by array	GSM534679	Palea_7.0mm_floret_rep3	Palea from 7.0mm floret, replicate 3	Nipponbare
GSE21494	Expression profiling by array	GSM534690	Ovary_07DAF_rep1	Ovary at 7 days after flowering,replicate 1	Nipponbare
GSE21494	Expression profiling by array	GSM534691	Ovary_07DAF_rep2	Ovary at 7 days after flowering,replicate 2	Nipponbare
GSE21494	Expression profiling by array	GSM534692	Ovary_07DAF_rep3	Ovary at 7 days after flowering,replicate 3	Nipponbare
GSE21494	Expression profiling by array	GSM534705	Embryo_42DAF_rep1	Embryo at 42 days after flower, replicate 1	Nipponbare
GSE21494	Expression profiling by array	GSM534706	Embryo_42DAF_rep2	Embryo at 42 days after flower, replicate 2	Nipponbare
GSE21494	Expression profiling by array	GSM534707	Embryo_42DAF_rep3	Embryo at 42 days after flower, replicate 3	Nipponbare
GSE21494	Expression profiling by array	GSM534720	Endosperm_42DAF_rep1	Endospermat 42 days after flower, replicate 1	Nipponbare
GSE21494	Expression profiling by array	GSM534721	Endosperm_42DAF_rep2	Endospermat 42 days after flower, replicate 2	Nipponbare
GSE21494	Expression profiling by array	GSM534722	Endosperm_42DAF_rep3	Endospermat 42 days after flower, replicate 3	Nipponbare
expression analysis of rubredoxins under abiotic stress at Arabidopsis thaliana
GEO accession	Experiment Type	Sample accession	Tittle	Source	Treatment group
GSE80099	Expression profiling by array	GSM2112821	A. thaliana control early time point rep 1	shoot tissue, regular watering	regular watering
GSE80099	Expression profiling by array	GSM2112822	A. thaliana control early time point rep 2	shoot tissue, regular watering	regular watering
GSE80099	Expression profiling by array	GSM2112823	A. thaliana control early time point rep 3	shoot tissue, regular watering	regular watering
GSE80099	Expression profiling by array	GSM2112824	A. thaliana drought early time point rep 1	shoot tissue, 8 days after withdrawal of watering	8 days after withdrawal of watering
GSE80099	Expression profiling by array	GSM2112825	A. thaliana drought early time point rep 2	shoot tissue, 8 days after withdrawal of watering	8 days after withdrawal of watering
GSE80099	Expression profiling by array	GSM2112826	A. thaliana drought early time point rep 3	shoot tissue, 8 days after withdrawal of watering	8 days after withdrawal of watering
GSE80099	Expression profiling by array	GSM2112827	A. thaliana control late time point rep 1	shoot tissue, regular watering	regular watering
GSE80099	Expression profiling by array	GSM2112828	A. thaliana control late time point rep 2	shoot tissue, regular watering	regular watering
GSE80099	Expression profiling by array	GSM2112829	A. thaliana control late time point rep 3	shoot tissue, regular watering	regular watering
GSE80099	Expression profiling by array	GSM2112830	A. thaliana drought late time point rep 1	shoot tissue, 11 days after withdrawal of watering	11 days after withdrawal of watering
GSE80099	Expression profiling by array	GSM2112831	A. thaliana drought late time point rep 2	shoot tissue, 11 days after withdrawal of watering	11 days after withdrawal of watering
GSE80099	Expression profiling by array	GSM2112832	A. thaliana drought late time point rep 3	shoot tissue, 11 days after withdrawal of watering	11 days after withdrawal of watering
GSE80114	Expression profiling by array	GSM2112951	A. thaliana control regular watering early time point rep 1	shoot tissues, regular watering, 3h time point	regular watering
GSE80114	Expression profiling by array	GSM2112952	A. thaliana control regular watering early time point rep 2	shoot tissues, regular watering, 3h time point	regular watering
GSE80114	Expression profiling by array	GSM2112953	A. thaliana control regular watering early time point rep 3	shoot tissues, regular watering, 3h time point	regular watering
GSE80114	Expression profiling by array	GSM2112954	A. thaliana salt, moderate conc., early time point rep 1	shoot tissues, 250mM NaCl treatment, 3h post treatment harvest	250mM NaCl treatment
GSE80114	Expression profiling by array	GSM2112955	A. thaliana salt, moderate conc., early time point rep 2	shoot tissues, 250mM NaCl treatment, 3h post treatment harvest	250mM NaCl treatment
GSE80114	Expression profiling by array	GSM2112956	A. thaliana salt, moderate conc., early time point rep 3	shoot tissues, 250mM NaCl treatment, 3h post treatment harvest	250mM NaCl treatment
GSE80114	Expression profiling by array	GSM2112957	A. thaliana salt, high conc., early time point rep 1	shoot tissues, 500mM NaCl treatment, 3h post treatment harvest	500mM NaCl treatment
GSE80114	Expression profiling by array	GSM2112958	A. thaliana salt, high conc., early time point rep 2	shoot tissues, 500mM NaCl treatment, 3h post treatment harvest	500mM NaCl treatment
GSE80114	Expression profiling by array	GSM2112959	A. thaliana salt, high conc., early time point rep 3	shoot tissues, 500mM NaCl treatment, 3h post treatment harvest	500mM NaCl treatment
GSE80114	Expression profiling by array	GSM2112960	A. thaliana control regular watering late time point rep 1	shoot tissues, regular watering, 27h time point	regular watering
GSE80114	Expression profiling by array	GSM2112961	A. thaliana control regular watering late time point rep 2	shoot tissues, regular watering, 27h time point	regular watering
GSE80114	Expression profiling by array	GSM2112962	A. thaliana control regular watering late time point rep 3	shoot tissues, regular watering, 27h time point	regular watering
GSE80114	Expression profiling by array	GSM2112963	A. thaliana salt, moderate conc., late time point rep 1	shoot tissues, 250mM NaCl treatment, 27h post treatment harvest	250mM NaCl treatment
GSE80114	Expression profiling by array	GSM2112964	A. thaliana salt, moderate conc., late time point rep 2	shoot tissues, 250mM NaCl treatment, 27h post treatment harvest	250mM NaCl treatment
GSE80114	Expression profiling by array	GSM2112965	A. thaliana salt, moderate conc., late time point rep 3	shoot tissues, 250mM NaCl treatment, 27h post treatment harvest	250mM NaCl treatment
GSE80114	Expression profiling by array	GSM2112966	A. thaliana salt, high conc., late time point rep 1	shoot tissues, 500mM NaCl treatment, 27h post treatment harvest	500mM NaCl treatment
GSE80114	Expression profiling by array	GSM2112967	A. thaliana salt, high conc., late time point rep 2	shoot tissues, 500mM NaCl treatment, 27h post treatment harvest	500mM NaCl treatment
GSE80114	Expression profiling by array	GSM2112968	A. thaliana salt, high conc., late time point rep 3	shoot tissues, 500mM NaCl treatment, 27h post treatment harvest	500mM NaCl treatment
Expression analysis of rubredoxins under abiotic stresses at Arabidopsis lyrata
GEO accession	Experiment Type	Sample accession	Tittle	Source	Treatment group
GSE80110	Expression profiling by array	GSM2112911	A. lyrata control early time point rep 1	shoot tissues, regular watering	regular watering
GSE80110	Experiment Type	GSM2112912	A. lyrata control early time point rep 2	shoot tissues, regular watering	regular watering
GSE80110	Expression profiling by array	GSM2112913	A. lyrata control early time point rep 3	shoot tissues, regular watering	regular watering
GSE80110	Experiment Type	GSM2112914	A. lyrata drought early time point rep 1	shoot tissues, 8 days after withdrawal of watering	8 days after withdrawal of watering
GSE80110	Expression profiling by array	GSM2112915	A. lyrata drought early time point rep 2	shoot tissues, 9 days after withdrawal of watering	9 days after withdrawal of watering
GSE80110	Experiment Type	GSM2112916	A. lyrata drought early time point rep 3	shoot tissues, 10 days after withdrawal of watering	10 days after withdrawal of watering
GSE80110	Expression profiling by array	GSM2112917	A. lyrata control late time point rep 1	shoot tissues, regular watering	regular watering
GSE80110	Experiment Type	GSM2112918	A. lyrata control late time point rep 2	shoot tissues, regular watering	regular watering
GSE80110	Expression profiling by array	GSM2112919	A. lyrata control late time point rep 3	shoot tissues, regular watering	regular watering
GSE80110	Experiment Type	GSM2112920	A. lyrata drought late time point rep 1	shoot tissues, 11 days after withdrawal of watering	11 days after withdrawal of watering
GSE80110	Expression profiling by array	GSM2112921	A. lyrata drought late time point rep 2	shoot tissues, 11 days after withdrawal of watering	11 days after withdrawal of watering
GSE80110	Experiment Type	GSM2112922	A. lyrata drought late time point rep 3	shoot tissues, 11 days after withdrawal of watering	11 days after withdrawal of watering
GSE80115	Expression profiling by array	GSM2112969	A. lyrata control regular watering early time point rep 1	shoot tissues, regular watering, 3h time point	regular watering
GSE80115	Experiment Type	GSM2112970	A. lyrata control regular watering early time point rep 2	shoot tissues, regular watering, 3h time point	regular watering
GSE80115	Expression profiling by array	GSM2112971	A. lyrata control regular watering early time point rep 3	shoot tissues, regular watering, 3h time point	regular watering
GSE80115	Experiment Type	GSM2112972	A. lyrata salt, moderate conc., early time point rep 1	shoot tissues, 250mM NaCl treatment, 3h post treatment harvest	250mM NaCl treatment
GSE80115	Expression profiling by array	GSM2112973	A. lyrata salt, moderate conc., early time point rep 2	shoot tissues, 250mM NaCl treatment, 3h post treatment harvest	250mM NaCl treatment
GSE80115	Experiment Type	GSM2112974	A. lyrata salt, moderate conc., early time point rep 3	shoot tissues, 250mM NaCl treatment, 3h post treatment harvest	250mM NaCl treatment
GSE80115	Expression profiling by array	GSM2112975	A. lyrata salt, high conc., early time point rep 1	shoot tissues, 500mM NaCl treatment, 3h post treatment harvest	500mM NaCl treatment
GSE80115	Experiment Type	GSM2112976	A. lyrata salt, high conc., early time point rep 2	shoot tissues, 500mM NaCl treatment, 3h post treatment harvest	500mM NaCl treatment
GSE80115	Expression profiling by array	GSM2112977	A. lyrata salt, high conc., early time point rep 3	shoot tissues, 500mM NaCl treatment, 3h post treatment harvest	500mM NaCl treatment
GSE80115	Experiment Type	GSM2112978	A. lyrata control regular watering late time point rep 1	shoot tissues, regular watering, 27h time point	regular watering
GSE80115	Expression profiling by array	GSM2112979	A. lyrata control regular watering late time point rep 2	shoot tissues, regular watering, 27h time point	regular watering
GSE80115	Experiment Type	GSM2112980	A. lyrata control regular watering late time point rep 3	shoot tissues, regular watering, 27h time point	regular watering
GSE80115	Expression profiling by array	GSM2112981	A. lyrata salt, moderate conc., late time point rep 1	shoot tissues, 250mM NaCl treatment, 27h post treatment harvest	250mM NaCl treatment
GSE80115	Experiment Type	GSM2112982	A. lyrata salt, moderate conc., late time point rep 2	shoot tissues, 250mM NaCl treatment, 27h post treatment harvest	250mM NaCl treatment
GSE80115	Expression profiling by array	GSM2112983	A. lyrata salt, moderate conc., late time point rep 3	shoot tissues, 250mM NaCl treatment, 27h post treatment harvest	250mM NaCl treatment
GSE80115	Experiment Type	GSM2112984	A. lyrata salt, high conc., late time point rep 1	shoot tissues, 500mM NaCl treatment, 3h post treatment harvest	500mM NaCl treatment
GSE80115	Expression profiling by array	GSM2112985	A. lyrata salt, high conc., late time point rep 2	shoot tissues, 500mM NaCl treatment, 3h post treatment harvest	500mM NaCl treatment
GSE80115	Experiment Type	GSM2112986	A. lyrata salt, high conc., late time point rep 3	shoot tissues, 500mM NaCl treatment, 3h post treatment harvest	500mM NaCl treatment
Expression analysis of rubredoxins under abiotic stress at Oryza sativa
GEO accession	Experiment type	Sample accession	Tittle	Source	Treatment group	Cultivar
GSE74465	Expression profiling by high throughput sequencing	GSM1921121	WT 0h RNA-Seq	Whole plant	regular watering	wild type nipponbare
GSE74465	Expression profiling by high throughput sequencing	GSM1921122	WT 1h RNA-Seq	Whole plant	drought-stress for 1 hr by removal of the culture solution	wild type nipponbare
GSE74465	Expression profiling by high throughput sequencing	GSM1921123	WT 6h RNA-Seq	Whole plant	drought-stress for 6 hr by removal of the culture solution	wild type nipponbare
GSE20746	Expression profiling by array	GSM520630	salinity shoot 1	Shoot	regular watering	Nipponbare
GSE20746	Expression profiling by array	GSM520631	salinity shoot 2	Shoot	150 mM NaCl solution for 1h	Nipponbare
GSE20746	Expression profiling by array	GSM520632	salinity root 1	Root	regular watering	Nipponbare
GSE20746	Expression profiling by array	GSM520633	salinity root 2	Root	150 mM NaCl solution for 1h	Nipponbare
Expression analysis of rubredoxin under abiotic stress at Zea mays
GEO accession	Experiment type	Sample accession	Tittle	Source	Treatment group	Cultivar
GSE71046	Expression profiling by high throughput sequencing	GSM1826055	wt Control T0 Rep1	youngest wrapped leaf	Control	B73 wt
GSE71046	Expression profiling by high throughput sequencing	GSM1826071	wt Control T0 Rep2+Rep3	youngest wrapped leaf	Control	B73 wt
GSE71046	Expression profiling by high throughput sequencing	GSM1826056	wt Drought T0 Rep1	youngest wrapped leaf	after 10 days of drought treatment	B73 wt
GSE71046	Expression profiling by high throughput sequencing	GSM1826072	wt Drought T0 Rep2+Rep3	youngest wrapped leaf	after 10 days of drought treatment	B73 wt
GSE71046	Expression profiling by high throughput sequencing	GSM1826059	wt Control T7 Rep1	youngest wrapped leaf	control	B73 wt
GSE71046	Expression profiling by high throughput sequencing	GSM1826075	wt Control T7 Rep2+Rep3	youngest wrapped leaf	control	B74 wt
GSE71046	Expression profiling by high throughput sequencing	GSM1826060	wt Drought T7 Rep1	youngest wrapped leaf	drought, after 7 additional days of recovery	B74 wt
GSE71046	Expression profiling by high throughput sequencing	GSM1826076	wt Drought T7 Rep2+Rep3	youngest wrapped leaf	drought, after 7 additional days of recovery	B74 wt
GSE53995	Expression profiling by high throughput sequencing	GSM1305173	PR.fq	primary root	Control	-
GSE53995	Expression profiling by high throughput sequencing	GSM1305174	PR_salt.fq	primary root under 100mm NaCl 24h	100 mM NaCl for 24 h	-
GSE53995	Expression profiling by high throughput sequencing	GSM1305175	CR.fq	crown roots	Control	-
GSE53995	Expression profiling by high throughput sequencing	GSM1305176	CR_salt.fq	crown roots under 100mm NaCl 24h	100 mM NaCl for 24 h	-
GSE53995	Expression profiling by high throughput sequencing	GSM1305177	SR.fq	seminal roots	Control	-
GSE53995	Expression profiling by high throughput sequencing	GSM1305178	SR_salt.fq	seminal roots under 100mm NaCl 24h	100 mM NaCl for 24 h	-
Expression analysis of rubredoxin at Eutrema salsugineum
GEO accession	Experiment Type	Sample accession	Tittle	Source	Treatment group
GSE71271	Expression profiling by array	GSM1831691	33D_old_hydroponic_grown_rosette_leaves_control_replicate_1	33-day old hydroponic grown rosette leaves control plants	Control
GSE71271	Expression profiling by array	GSM1831692	33D_old_hydroponic_grown_rosette_leaves_control_replicate_2	33-day old hydroponic grown rosette leaves control plants	Control
GSE71271	Expression profiling by array	GSM1831693	33D_old_hydroponic_grown_rosette_leaves_control_replicate_3	33-day old hydroponic grown rosette leaves control plants	Control
GSE71271	Expression profiling by array	GSM1831694	29D_old_hydroponic_grown_rosette_leaves_1W_acclimated_at_200mM_NaCl_replicate_1	29-day-old hydroponic grown rosette leaves, 1-week 200 mM NaCl salt-acclimated	200mM NaCl for a week
GSE71271	Expression profiling by array	GSM1831695	29D_old_hydroponic_grown_rosette_leaves_1W_acclimated_at_200mM_NaCl_replicate_2	29-day-old hydroponic grown rosette leaves, 1-week 200 mM NaCl salt-acclimated	200mM NaCl for a week
GSE71271	Expression profiling by array	GSM1831696	29D_old_hydroponic_grown_rosette_leaves_1W_acclimated_at_200mM_NaCl_replicate_3	29-day-old hydroponic grown rosette leaves, 1-week 200 mM NaCl salt-acclimated	200mM NaCl for a week
GSE71271	Expression profiling by array	GSM1831697	35D_old_hydroponic_grown_rosette_leaves_1W_acclimated_at_500mM_NaCl_replicate_1	35-day-old hydroponic grown rosette leaves, 1-week 500 mM NaCl salt-acclimated	500mM NaCl for a week
GSE71271	Expression profiling by array	GSM1831698	35D_old_hydroponic_grown_rosette_leaves_1W_acclimated_at_500mM_NaCl_replicate_2	35-day-old hydroponic grown rosette leaves, 1-week 500 mM NaCl salt-acclimated	500mM NaCl for a week
GSE71271	Expression profiling by array	GSM1831699	35D_old_hydroponic_grown_rosette_leaves_1W_acclimated_at_500mM_NaCl_replicate_3	35-day-old hydroponic grown rosette leaves, 1-week 500 mM NaCl salt-acclimated	500mM NaCl for a week
