# Supplementary material for: Molecular Evolution and Functional Analysis of Rubredoxin-Like Proteins in Plants
Source: Biomed Res Int. 2019 Jul 2;2019:2932585. doi: 10.1155/2019/2932585 (PMC6634066; doi:10.1155/2019/2932585)
Supplement: Supplementary 3 — S3 File. The chemical-physical characteristics of candidate rubredoxin. [file 2932585.f3.xlsx]

## Sheet: Sheet1
protein_ids	num of aa	molecule weight(KDa)	pI	Loc	LOC(wolfpsort)	Loc(BUSCA)	GRAVY
XP_012090944_Jcurcas	269	28.326	9.61	C	chlo	C:organelle membrane	-0.095
XP_011075820_Sindicum	264	27.734	9.42	C	chlo	C:chloroplast thylakoid membrane	-0.032
XP_010940800_Eguineensis	274	28.87	10.01	C	chlo	C:mitochondrial membrane	-0.13
XP_010671163_Bvulgaris	267	28.194	9.54	C	chlo	C:chloroplast thylakoid membrane	-0.117
XP_010549812_Thassleriana	273	28.595	9.73	C	extr	C:chloroplast thylakoid membrane	-0.129
XP_010492656_Csativa	273	28.658	9.6	C	chlo	C:chloroplast thylakoid membrane	-0.08
XP_010453899_Csativa	273	28.439	9.6	C	chlo	C:chloroplast thylakoid membrane	-0.081
XP_010255717_Nnucifera	273	28.965	9.82	C	chlo	C:chloroplast thylakoid membrane	-0.22
XP_010234369_Bdistachyon	259	27.046	9.63	C	chlo	C:chloroplast thylakoid membrane	-0.094
XP_010034959_Egrandis	274	28.482	9.67	C	chlo	C:chloroplast thylakoid membrane	-0.123
XP_009782148_Nsylvestris	279	29.169	9.63	C	chlo	C:chloroplast thylakoid membrane	-0.153
XP_009621636_Ntomentosiformis	278	29.119	9.56	C	chlo	C:chloroplast thylakoid membrane	-0.1
XP_009391043_Mmalaccensis	269	27.916	9.66	C	chlo	C:chloroplast thylakoid membrane	-0.054
XP_009361210_Pbretschneideri	281	29.37	9.72	C	chlo	C:chloroplast thylakoid membrane	-0.123
XP_009126163_Brapa	272	28.613	9.61	C	chlo	C:chloroplast thylakoid membrane	-0.1
XP_009122863_Brapa	187	19.856	9.7	*	cyto	C:organelle membrane	-0.117
XP_008776363_Pdactylifera	267	28.198	9.76	C	chlo	C:chloroplast thylakoid membrane	-0.142
XP_008467304_Cmelo	273	28.201	9.59	C	chlo	C:chloroplast thylakoid membrane	-0.118
XP_008376881_Mdomestica	279	29.224	9.78	C	chlo	C:chloroplast thylakoid membrane	-0.163
XP_008234595_Pmume	285	29.834	9.77	C	chlo	C:chloroplast thylakoid membrane	-0.099
XP_007513116_Bprasinos	204	21.734	9.18	-	Cyto	C:nucleus	-0.095
XP_007218777_Ppersica	285	29.808	9.77	C	chlo	C:chloroplast thylakoid membrane	-0.101
XP_007029491_Tcacao	276	28.914	9.74	C	chlo	C:chloroplast thylakoid membrane	-0.158
XP_006854166_Atrichopoda	272	28.808	9.71	C	chlo	C:organelle membrane	-0.164
XP_006659158_Obrachyantha	260	27.359	9.85	C	chlo	C:chloroplast thylakoid membrane	-0.113
XP_006491817_Csinensis	261	27.824	9.85	C	chlo	C:organelle membrane	-0.16
XP_006428498_Cclementina	261	27.84	9.85	C	chlo	C:organelle membrane	-0.139
XP_006400247_Esalsugineum	337	36.105	9.72	*	nucl	C:organelle membrane	-0.256
XP_006347557_Stuberosum	278	28.947	9.6	C	chlo	C:chloroplast thylakoid membrane	-0.112
XP_006288445_Crubella	271	28.31	9.6	C	extr	C:chloroplast thylakoid membrane	-0.099
XP_004972763_Sitalica	264	27.884	9.91	C	chlo	C:chloroplast thylakoid membrane	-0.11
XP_004511463_Carietinum	274	28.95	9.71	C	chlo	C:chloroplast thylakoid membrane	-0.146
XP_004307912_Fvesca	275	28.824	9.63	C	chlo	C:chloroplast thylakoid membrane	-0.076
XP_004235309_Slycopersicum	278	29.01	9.62	C	chlo	C:chloroplast thylakoid membrane	-0.148
XP_004143657_Csativus	276	28.597	9.58	C	chlo	C:chloroplast thylakoid membrane	-0.093
XP_003610879_Mtruncatula	275	28.854	9.77	C	chlo	C:chloroplast thylakoid membrane	-0.2
XP_003573446_Bdistachyon	257	27.174	9.68	C	chlo	C:chloroplast thylakoid membrane	-0.109
XP_003537918_Gmax	360	28.868	9.7	C	chlo	C:organelle membrane	-0.214
XP_003517534_Gmax	274	28.579	9.55	C	chlo	C:chloroplast thylakoid membrane	-0.151
XP_003080003_Otauri	230	24.414	9.7	C	chlo	C:chloroplast thylakoid membrane	-0.105
XP_002948168_Vocar	231	24.569	9.46	-	chlo	C:chloroplast thylakoid membrane	-0.163
XP_002871751_Alyrata	269	28.25	9.46	C	vacu	C:chloroplast thylakoid membrane	-0.072
XP_002520001_Rcommunis	273	28.687	9.68	C	chlo	C:chloroplast thylakoid membrane	-0.166
XP_002443912_Sbicolor	262	27.701	9.88	C	chlo	C:mitochondrial membrane	-0.087
XP_002325879_Ptrichocarpa	275	28.89	9.58	C	chlo	C:chloroplast thylakoid membrane	-0.092
SaRub_Smongolica	272	28.737	9.62	C	chlo	C:chloroplast thylakoid membrane	-0.159
PutRub_Ptenuiflora	257	27.381	9.85	C	chlo	C:mitochondrial membrane	-0.171
NP_568342.1_Athaliana	271	28.46	9.6	C	chlo	C:chloroplast thylakoid membrane	-0.0067
NP_001183375_Zmays	261	27.729	9.88	C	chlo	C:chloroplast thylakoid membrane	-0.134
NP_001061060_Osativa	260	27.486	9.82	C	chlo	C:chloroplast thylakoid membrane	-0.129
KJB18332_Graimondii	275	28.706	9.46	C	chlo	C:chloroplast thylakoid membrane	-0.17
KHN25601_Gsoja	274	28.806	9.62	C	chlo	C:chloroplast thylakoid membrane	-0.181
KFK44649_Aalpina	271	28.5	9.6	C	chlo	C:chloroplast thylakoid membrane	-0.113
EYU45365_Mguttatus	272	28.716	9.53	C	nucl	C:chloroplast thylakoid membrane	-0.058
EMS68403_Turartu	259	27.429	9.83	C	chlo	C:chloroplast thylakoid membrane	-0.118
CDY16955_Bnapus	246	26.098	9.65	C	chlo	C:chloroplast thylakoid membrane	-0.169
CDY02732_Bnapus	270	28.472	9.55	C	chlo	C:chloroplast thylakoid membrane	-0.073
CDX85473_Bnapus	271	28.541	9.55	C	chlo	C:chloroplast thylakoid membrane	-0.103
CDP04950_Ccanephora	258	26.748	9.8	C	chlo	C:chloroplast thylakoid membrane	-0.11
BAJ94117_Hvulgare	259	27.366	9.71	C	chlo	C:chloroplast thylakoid membrane	-0.073
AFW57239_Zmays	346	37.177	9.97	-	chlo	C:organelle membrane	-0.298
AFW57238_Zmays	345	37.049	9.97	-	chlo	C:organelle membrane	-0.289
AFK49465_Ljaponicus	261	27.337	9.84	C	chlo	C:chloroplast thylakoid lumen	-0.168
ACU19298_Gmax	274	28.892	9.7	C	chlo	C:chloroplast thylakoid membrane	-0.195
ACJ85407_Mtruncatula	273	28.623	9.71	C	chlo	C:chloroplast thylakoid membrane	-0.195
ABK21407_Psitchensis	262	27.743	9.57	C	chlo	C:chloroplast thylakoid membrane	-0.092
