# Supplementary material for: Molecular Evolution and Functional Analysis of Rubredoxin-Like Proteins in Plants
Source: Biomed Res Int. 2019 Jul 2;2019:2932585. doi: 10.1155/2019/2932585 (PMC6634066; doi:10.1155/2019/2932585)
Supplement: Supplementary 4 — S4 File. The significant function annotations of DAVID. [file 2932585.f4.xlsx]

## Sheet: Sheet1
Category	Term	Count	%	PValue
UP_KEYWORDS	Transit peptide	61	68.5393	1.57e-49	PSBW, PsbP, LUT1, Lhca6, RCA, PQL2, PSBTN, LPA2, PSB28, PGR1, TROL, PDE346, PPL1, CSP41B, PSI-H, PRXQ, NTRC, CSP41A, SULA, PSAG, PHT2;1, PDE335, CURT1A, F5D14_25, HHOA, GAPA-2, STM, PSAE-1, FBA2, HAD, 1-Sep, TPT, SBPASE, LUT5, PSBS, PPL2, CaS, GAPB, GDCH, NdhN, PRK, PPR-like, AtTLP18.3, ATPC1, PETE1, GUN4, FED A, T26D3_4, PETE2, FBA1, PSII, GAPA-1, PGDH3, FNR1, PMDH2, GLUS, PSBQA, YCF32, HCF136, …
UP_KEYWORDS	Chloroplast	57	64.0449	1.34e-48	PSBW, PsbP, LUT1, Lhca6, RCA, PQL2, PSBTN, LPA2, PSB28, PGR1, TROL, PDE346, PPL1, CSP41B, PSI-H, PRXQ, NTRC, CSP41A, SULA, PSAG, PHT2;1, PDE335, CURT1A, HHOA, GAPA-2, PSAE-1, FBA2, HAD, 1-Sep, TPT, SBPASE, LUT5, PSBS, PPL2, CaS, GAPB, NdhN, PRK, PPR-like, AtTLP18.3, ATPC1, PETE1, GUN4, FED A, T26D3_4, PETE2, FBA1, PSII, GAPA-1, PGDH3, FNR1, GLUS, PSBQA, YCF32, HCF136, PSRP3/1, TZ,
UP_KEYWORDS	Plastid	57	64.0449	1.68e-48	PSBW, PsbP, LUT1, Lhca6, RCA, PQL2, PSBTN, LPA2, PSB28, PGR1, TROL, PDE346, PPL1, CSP41B, PSI-H, PRXQ, NTRC, CSP41A, SULA, PSAG, PHT2;1, PDE335, CURT1A, HHOA, GAPA-2, PSAE-1, FBA2, HAD, 1-Sep, TPT, SBPASE, LUT5, PSBS, PPL2, CaS, GAPB, NdhN, PRK, PPR-like, AtTLP18.3, ATPC1, PETE1, GUN4, FED A, T26D3_4, PETE2, FBA1, PSII, GAPA-1, PGDH3, FNR1, GLUS, PSBQA, YCF32, HCF136, PSRP3/1, TZ,
GOTERM_CC_DIRECT	GO:0009507~chloroplast	73	82.0225	1.01e-44	PSBW, PsbP, LUT1, Lhca6, RCA, PSBTN, PQL2, LPA2, PSB28, PGR1, TROL, PDE346, PPL1, CSP41B, HPR, MWD22_5, AT2G21385, PRXQ, PSI-H, DnaJ/Hsp40 cysteine-rich domain, NTRC, CSP41A, SULA, PSAG, PHT2;1, MCK7_20, PDE335, CURT1A, F5D14_25, HHOA, GAPA-2, STM, FBA2, F16P2_44, PSAE-1, HAD, TPT, SBPASE, petM, LUT5, PSBS, PPL2, CaS, GAPB, GDCH, PRK, NdhN, PPR-like, AtTLP18.3, ATPC1, PETE1, GUN4, AT3G47070, AT3G…
GOTERM_CC_DIRECT	GO:0009535~chloroplast thylakoid membrane	38	42.6966	2.85e-43	PSBW, PsbP, petM, PSBS, Lhca6, PPL2, RCA, PSBTN, PQL2, CaS, LPA2, PSB28, GAPB, PGR1, NdhN, PRK, TROL, AtTLP18.3, PETE1, ATPC1, AT3G47070, PRXQ, PSI-H, PSAG, PETE2, PSII, PDE335, GAPA-1, CURT1A, FNR1, PSBQA, ENH1, YCF32, PSAE-1, F16P2_44, HCF136, PSRP3/1, 1-Sep,
GOTERM_CC_DIRECT	GO:0009579~thylakoid	32	35.9551	6.97e-43	SBPASE, PsbP, PSBS, PPL2, RCA, CaS, PSB28, GDCH, PGR1, PRK, AtTLP18.3, PETE1, ATPC1, PPL1, AT3G47070, PSI-H, CSP41A, PSAG, PETE2, RPE, FBA1, PSII, MCK7_20, CURT1A, FNR1, HHOA, PSBQA, FBA2, PSAE-1, HCF136, PSRP3/1, TZ,
UP_KEYWORDS	Thylakoid	31	34.8315	1.52e-37	PSBW, PsbP, PSBS, Lhca6, PPL2, PSBTN, PQL2, CaS, LPA2, PSB28, PGR1, NdhN, TROL, AtTLP18.3, PETE1, ATPC1, PPL1, PRXQ, PSI-H, PSAG, PETE2, PSII, PDE335, CURT1A, FNR1, HHOA, PSBQA, YCF32, PSAE-1, HCF136, 1-Sep,
UP_SEQ_FEATURE	transit peptide:Chloroplast	40	44.9438	7.27e-36	PSBW, SBPASE, PsbP, PSBS, PPL2, RCA, PSBTN, PSB28, GAPB, PGR1, PRK, PPR-like, PDE346, AtTLP18.3, PETE1, ATPC1, PPL1, GUN4, CSP41B, PRXQ, PSI-H, CSP41A, FED A, PSAG, PETE2, PHT2;1, FBA1, PSII, GAPA-1, CURT1A, FNR1, HHOA, GLUS, PSBQA, YCF32, PSAE-1, FBA2, HCF136, PSRP3/1, TZ,
GOTERM_CC_DIRECT	GO:0009941~chloroplast envelope	36	40.4494	1.85e-35	SBPASE, LUT1, LUT5, Lhca6, RCA, GAPB, PGR1, NdhN, PRK, TROL, ATPC1, CSP41B, AT2G21385, AT3G47070, PRXQ, CSP41A, SULA, PSAG, PHT2;1, RPE, FBA1, PSII, MCK7_20, GAPA-1, CURT1A, FNR1, PMDH2, GLUS, ENH1, GAPA-2, FBA2, PSAE-1, HCF136, HAD, TZ, TPT,
GOTERM_CC_DIRECT	GO:0009534~chloroplast thylakoid	24	26.9663	1.54e-28	AT3G47070, PRXQ, PSI-H, PSBS, CSP41A, PSAG, PETE2, FBA1, PQL2, PSII, CaS, LPA2, CURT1A, PGR1, FNR1, TROL, AtTLP18.3, PSBQA, ENH1, ATPC1, STM, PSAE-1, HCF136, TPT,
GOTERM_CC_DIRECT	GO:0009570~chloroplast stroma	27	30.3371	7.38e-21	SBPASE, RCA, PSB28, GAPB, PRK, CSP41B, AT2G21385, NTRC, FED A, CSP41A, T26D3_4, RPE, PETE2, FBA1, MCK7_20, GAPA-1, PGDH3, FNR1, GLUS, PSBQA, GAPA-2, STM, FBA2, PSRP3/1, HAD, HCF136, TZ,
UP_KEYWORDS	Photosynthesis	16	17.9775	1.59e-20	PSI-H, PSBW, PSBS, Lhca6, PSAG, PSBTN, PSII, PDE335, PSB28, PRK, FNR1, PSBQA, YCF32, PSAE-1, HCF136, 1-Sep,
GOTERM_BP_DIRECT	GO:0015979~photosynthesis	17	19.1011	7.38e-20	PSI-H, PSBW, PsbP, PSBS, Lhca6, PPL2, PSAG, PSBTN, PSII, PSB28, PDE335, PSBQA, YCF32, PPL1, PSAE-1, HCF136, 1-Sep,
KEGG_PATHWAY	ath00195:Photosynthesis	16	17.9775	5.5e-18	PSI-H, PSBW, PSBS, FED A, PSAG, PETE2, PQL2, PSB28, PGR1, FNR1, PSBQA, YCF32, ATPC1, PETE1, PPL1, PSAE-1,
GOTERM_CC_DIRECT	GO:0009543~chloroplast thylakoid lumen	12	13.4831	3.42e-15	PRXQ, PsbP, HHOA, AtTLP18.3, PSBQA, PETE1, PPL2, PPL1, HCF136, PETE2, PSBTN, PQL2,
UP_KEYWORDS	Photosystem II	10	11.236	5.27e-14	PSBW, PSBS, PSBQA, YCF32, HCF136, 1-Sep, PSII, PSBTN, PDE335, PSB28,
GOTERM_CC_DIRECT	GO:0048046~apoplast	19	21.3483	8.02e-14	XTH7, SBPASE, CSP41A, RPE, RCA, FBA1, MCK7_20, GAPA-1, GAPB, DIR1, PRK, FNR1, PMDH2, GLUS, GAPA-2, FBA2, STM, CSP41B, HPR,
GOTERM_CC_DIRECT	GO:0031977~thylakoid lumen	10	11.236	1.64e-13	FNR1, PsbP, HHOA, AtTLP18.3, PSBQA, PETE1, PPL1, HCF136, PETE2, FBA1,
GOTERM_CC_DIRECT	GO:0010287~plastoglobule	11	12.3596	1.98e-13	PRXQ, PSI-H, Lhca6, CSP41A, PSAE-1, FBA2, RCA, FBA1, PSII, CSP41B, CURT1A,
GOTERM_CC_DIRECT	GO:0010319~stromule	9	10.1124	6.07e-13	PRK, CSP41A, STM, RPE, RCA, TZ, CSP41B, GAPA-1, GAPB,
GOTERM_CC_DIRECT	GO:0030095~chloroplast photosystem II	7	7.86517	1.62e-11	PSBQA, YCF32, PPL2, PPL1, HCF136, PSBTN, PQL2,
GOTERM_CC_DIRECT	GO:0009523~photosystem II	8	8.98876	3.3e-11	PSBW, PSBS, YCF32, HCF136, 1-Sep, PSII, PSBTN, PDE335,
UP_SEQ_FEATURE	transit peptide:Thylakoid	9	10.1124	5.33e-10	PSBW, PsbP, HHOA, AtTLP18.3, PSBQA, PPL2, PPL1, HCF136, PETE2,
KEGG_PATHWAY	ath00710:Carbon fixation in photosynthetic organisms	10	11.236	2.38e-09	SBPASE, PRK, PMDH2, GAPA-2, FBA2, RPE, FBA1, MCK7_20, GAPA-1, GAPB,
KEGG_PATHWAY	ath01100:Metabolic pathways	34	38.2022	7.61e-09	SBPASE, PSBW, LUT1, LUT5, PSBS, ALDH11A3, PQL2, PSB28, GAPB, GDCH, PGR1, PRK, ATPC1, PPL1, HPR, MQD22_14, PSI-H, PSAG, RPE, FBA1, PSII, MCK7_20, GAPA-1, PGDH3, F5D14_25, FNR1, PMDH2, PSBQA, YCF32, GAPA-2, STM, FBA2, PSAE-1, TZ,
GOTERM_CC_DIRECT	GO:0009654~photosystem II oxygen evolving complex	6	6.74157	1.69e-08	PsbP, PSBQA, PPL2, PPL1, PQL2, PSB28,
KEGG_PATHWAY	ath01200:Carbon metabolism	14	15.7303	6.69e-08	PGDH3, SBPASE, PRK, PMDH2, ALDH11A3, GAPA-2, STM, FBA2, RPE, FBA1, HPR, MCK7_20, GAPA-1, GAPB,
GOTERM_MF_DIRECT	GO:0016168~chlorophyll binding	6	6.74157	1.99e-07	PSBS, Lhca6, PSAG, 1-Sep, PSII, PDE335,
UP_KEYWORDS	Oxidoreductase	18	20.2247	2.56e-07	PRXQ, LUT1, NTRC, LUT5, ALDH11A3, SULA, MCK7_20, GAPA-1, GAPB, PGR1, PGDH3, FNR1, NdhN, PMDH2, GLUS, GAPA-2, HPR, MQD22_14,
UP_KEYWORDS	Calvin cycle	5	5.61798	3.18e-07	SBPASE, PRK, GAPA-2, GAPA-1, GAPB,
GOTERM_BP_DIRECT	GO:0019253~reductive pentose-phosphate cycle	5	5.61798	1.2e-06	SBPASE, PRK, GAPA-2, GAPA-1, GAPB,
UP_KEYWORDS	Membrane	42	47.191	3.46e-06	PSBW, LUT1, petM, LUT5, PSBS, Lhca6, PPL2, PSBTN, PQL2, LPA2, CaS, PSB28, GAPB, PGR1, NdhN, TROL, AT3G22210, DUF247, AtTLP18.3, PETE1, ATPC1, GUN4, PSI-H, AT3G45050, SULA, PSAG, PETE2, PHT2;1, PSII, PDE335, GAPA-1, CURT1A, FNR1, DUF1138, PSBQA, ENH1, YCF32, PSAE-1, F16P2_44, HCF136, 1-Sep, TPT,
INTERPRO	IPR023329:Chlorophyll a/b binding protein domain	5	5.61798	6.18e-06	PSBS, Lhca6, 1-Sep, PSII, PDE335,
INTERPRO	IPR016040:NAD(P)-binding domain	10	11.236	6.84e-06	PGDH3, PMDH2, CSP41A, SULA, GAPA-2, HPR, CSP41B, MCK7_20, GAPA-1, GAPB,
UP_KEYWORDS	Photosystem I	5	5.61798	9.92e-06	PSI-H, Lhca6, PSAE-1, PSAG, PSII,
SMART	SM00846:SM00846	3	3.37079	1.21e-05	GAPA-2, GAPA-1, GAPB,
GOTERM_BP_DIRECT	GO:0055114~oxidation-reduction process	18	20.2247	1.68e-05	PRXQ, LUT1, NTRC, LUT5, ALDH11A3, PETE2, MCK7_20, GAPA-1, GAPB, PGDH3, FNR1, NdhN, GLUS, PETE1, GAPA-2, TZ, HPR, MQD22_14,
GOTERM_CC_DIRECT	GO:0019898~extrinsic component of membrane	5	5.61798	2.22e-05	PsbP, PSBQA, PPL2, PPL1, PQL2,
GOTERM_BP_DIRECT	GO:0009767~photosynthetic electron transport chain	4	4.49438	2.49e-05	PGR1, FNR1, FED A, PQL2,
GOTERM_MF_DIRECT	GO:0047100~glyceraldehyde-3-phosphate dehydrogenase (NADP+) (phosphorylating) activity	3	3.37079	3.77e-05	GAPA-2, GAPA-1, GAPB,
GOTERM_MF_DIRECT	GO:0008266~poly(U) RNA binding	4	4.49438	4.06e-05	FNR1, CSP41A, STM, HPR,
UP_KEYWORDS	NADP	8	8.98876	6.57e-05	FNR1, NdhN, NTRC, ALDH11A3, SULA, GAPA-2, GAPA-1, GAPB,
GOTERM_CC_DIRECT	GO:0016020~membrane	18	20.2247	9.05e-05	PSI-H, PSBS, PSAG, RCA, PSII, GAPA-1, GAPB, PGR1, PRK, DUF1138, GLUS, ATPC1, GAPA-2, PSAE-1, FBA2, STM, CSP41B, TPT,
GOTERM_CC_DIRECT	GO:0031969~chloroplast membrane	6	6.74157	0.000109	LUT1, LUT5, GUN4, GAPA-1, TPT, GAPB,
GOTERM_MF_DIRECT	GO:0051287~NAD binding	5	5.61798	0.000121	PGDH3, GAPA-2, HPR, GAPA-1, GAPB,
GOTERM_BP_DIRECT	GO:0006096~glycolytic process	5	5.61798	0.000168	GAPA-2, FBA2, FBA1, GAPA-1, GAPB,
GOTERM_BP_DIRECT	GO:0009409~response to cold	8	8.98876	0.000186	PRK, STM, RPE, RCA, TZ, CSP41B, GAPA-1, GAPB,
GOTERM_CC_DIRECT	GO:0009533~chloroplast stromal thylakoid	3	3.37079	0.00024	PRXQ, YCF32, HCF136,
INTERPRO	IPR020829:Glyceraldehyde 3-phosphate dehydrogenase, catalytic domain	3	3.37079	0.000256	GAPA-2, GAPA-1, GAPB,
INTERPRO	IPR020830:Glyceraldehyde 3-phosphate dehydrogenase, active site	3	3.37079	0.000256	GAPA-2, GAPA-1, GAPB,
INTERPRO	IPR020831:Glyceraldehyde/Erythrose phosphate dehydrogenase family	3	3.37079	0.000256	GAPA-2, GAPA-1, GAPB,
INTERPRO	IPR020828:Glyceraldehyde 3-phosphate dehydrogenase, NAD(P) binding domain	3	3.37079	0.000256	GAPA-2, GAPA-1, GAPB,
INTERPRO	IPR006424:Glyceraldehyde-3-phosphate dehydrogenase, type I	3	3.37079	0.000256	GAPA-2, GAPA-1, GAPB,
KEGG_PATHWAY	ath00630:Glyoxylate and dicarboxylate metabolism	6	6.74157	0.000295	GDCH, F5D14_25, PMDH2, GLUS, STM, HPR,
UP_KEYWORDS	Alternative splicing	22	24.7191	0.000525	PRXQ, PSBS, ALDH11A3, T26D3_4, PPL2, PHT2;1, RCA, FBA1, PSII, PSB28, CURT1A, PGR1, NdhN, FNR1, PMDH2, GLUS, PSBQA, GAPA-2, FBA2, PSRP3/1, HPR, TPT,
GOTERM_BP_DIRECT	GO:0019464~glycine decarboxylation via glycine cleavage system	3	3.37079	0.000528	GDCH, F5D14_25, STM,
UP_KEYWORDS	Electron transport	6	6.74157	0.000553	PGR1, FNR1, NTRC, PETE1, FED A, PETE2,
GOTERM_BP_DIRECT	GO:0042742~defense response to bacterium	7	7.86517	0.000771	PGR1, SBPASE, FNR1, PRK, TROL, RCA, CSP41B,
GOTERM_BP_DIRECT	GO:0009735~response to cytokinin	6	6.74157	0.000809	PSI-H, PRK, PMDH2, CSP41A, PSAE-1, HCF136,
GOTERM_BP_DIRECT	GO:0009416~response to light stimulus	6	6.74157	0.000828	GLUS, FED A, STM, RCA, GAPA-1, GAPB,
INTERPRO	IPR002683:Photosystem II PsbP, oxygen evolving complex	3	3.37079	0.000938	PsbP, PPL2, PPL1,
GOTERM_BP_DIRECT	GO:0032544~plastid translation	3	3.37079	0.000961	CSP41A, PSRP3/1, CSP41B,
GOTERM_BP_DIRECT	GO:0009853~photorespiration	4	4.49438	0.000971	GDCH, GLUS, STM, HPR,
